# Supplementary material
Source: Royal Society of Chemistry journal article supplement (doi:10.1039/d5ma01325a)
Supplement: d5ma01325a1.pdf [file d5ma01325a1.pdf]

## Unlocking High-Energy and Long-Life Supercapacitors via Zn–MnO<sub>2</sub>/MoS<sub>2</sub> Heterostructure Engineering

Muhammad Shoaib Bilal <sup>a, b</sup>, Muhammad Arslan <sup>a, c</sup>, Saqib Javed <sup>d</sup>, Amina Zafar <sup>e</sup>, Atia Khalid <sup>f</sup>, Shafqat Karim <sup>a</sup>, Naeem Ahmad <sup>g</sup>, Athar Javed <sup>h</sup>, Abdul Ghaffar <sup>\*b</sup>, Amjad Nisar <sup>\*a</sup> and Mashkoor Ahmad <sup>\*a</sup>

*a Nanomaterials Research Group, Physics Division, PINSTECH, Islamabad 44000, Pakistan.*

*b Department of Physics, Government College University, Lahore 54000, Pakistan.*

*c School of chemical & Material Engineering, NUST, Islamabad, Pakistan*

*d Theoretical Physics Division, PINSTECH, Islamabad 44000, Pakistan*

*e School of Material science and Engineering, Tsinghua University, Beijing, China.*

*f Central Analytical Facility Division, PINSTECH, Islamabad 44000, Pakistan*

*g Faculty of Basic & Applied Sciences, Department of Physics, IIU, Islamabad 44000, Pakistan.*

*h Department of Physics, University of the Punjab, Lahore, Pakistan.*

*\* Corresponding authors:*

*mashkoorahmad2003@yahoo.com (Mashkoor Ahmad)*

*chempk@gmail.com (Amjad Nisar)*

*abdulghaffar@gcu.edu.pk (Abdul Ghaffar)*

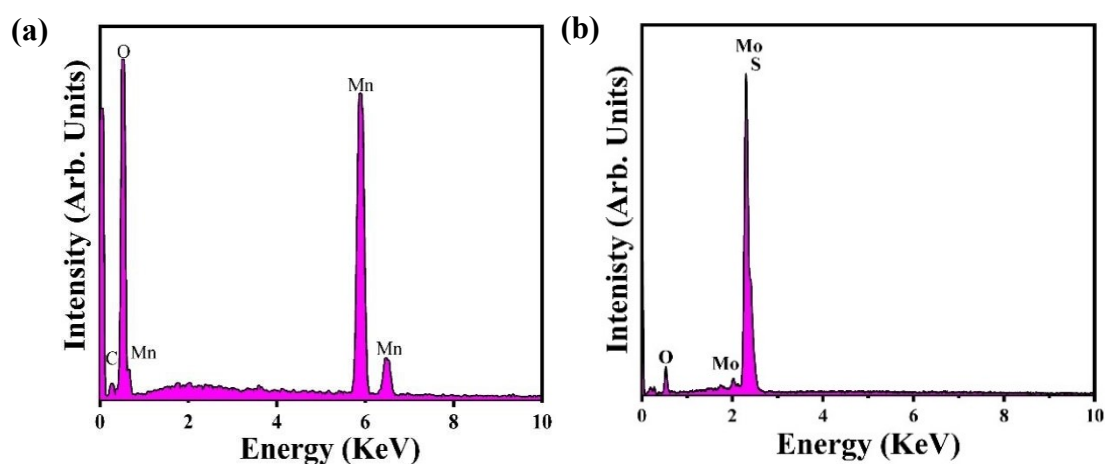

**Fig. S1.** EDX of (a) MnO<sub>2</sub> and (b) MoS<sub>2</sub> nanostructures.

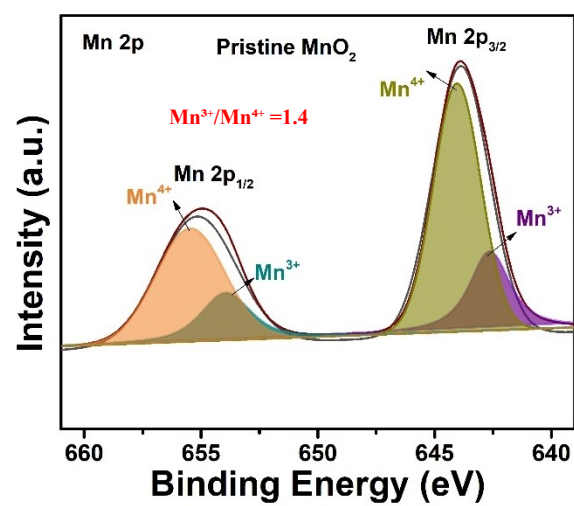

Fig. S2. High resolution XPS spectrum of Mn 2p peak of pristine MnO<sub>2</sub>.

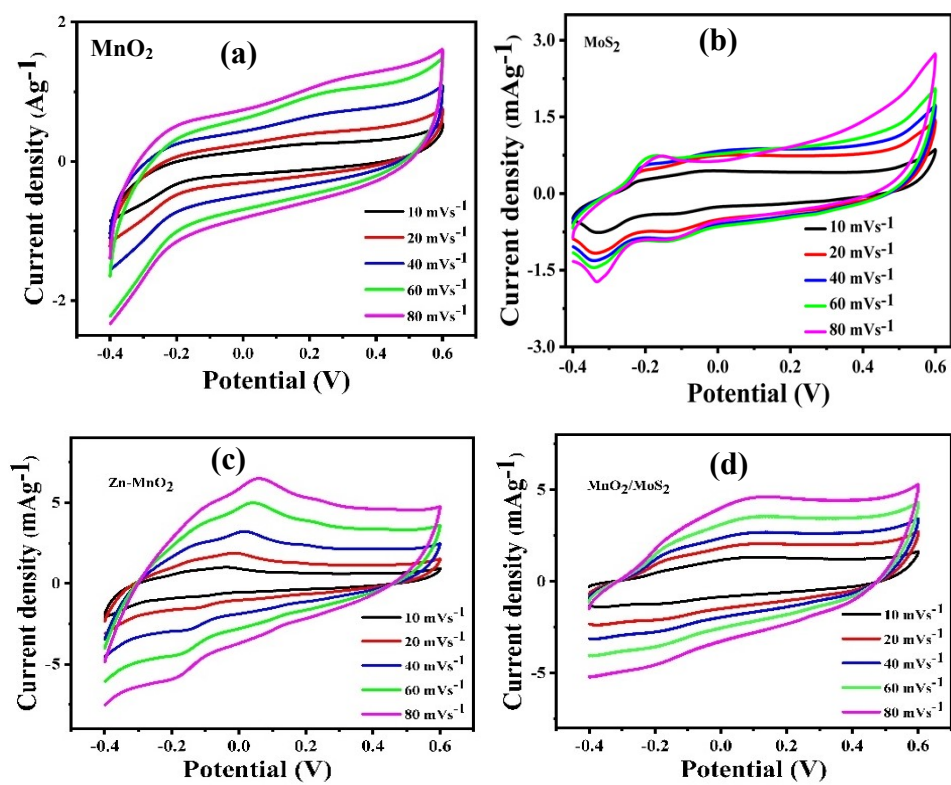

**Fig. S3.** (a,b,c,d) CV response of MnO<sub>2</sub>, MoS<sub>2</sub>, Zn-MnO<sub>2</sub> and MnO<sub>2</sub>/MoS<sub>2</sub> electrode

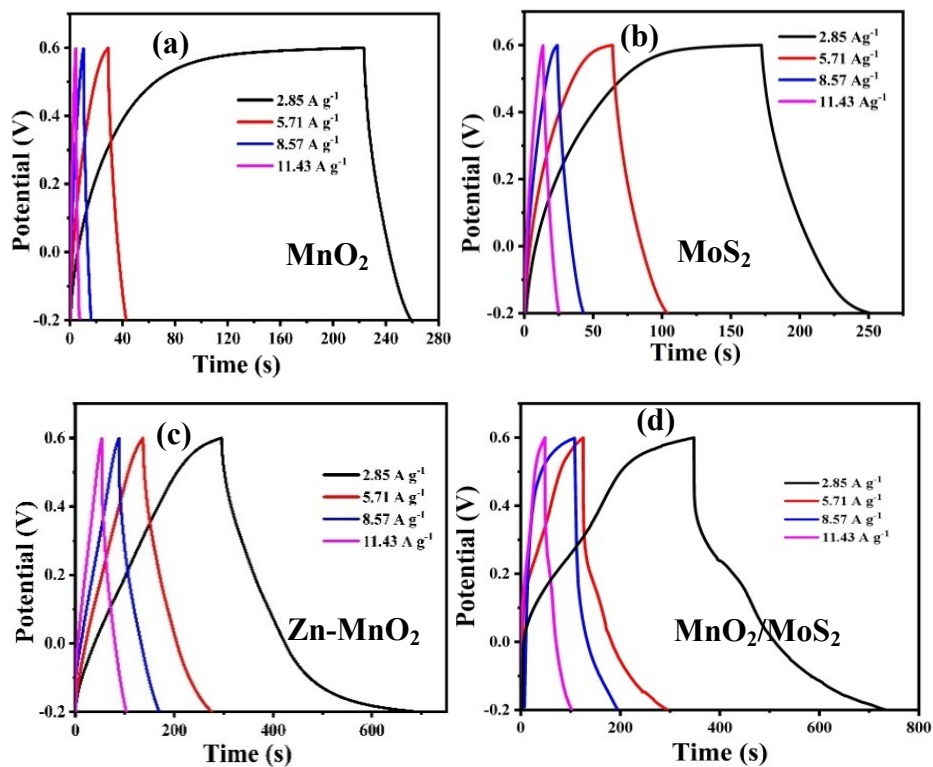

**Fig. S4.** (a,b,c,d) GCD curves of MnO<sub>2</sub>, MoS<sub>2</sub>, Zn-MnO<sub>2</sub> and MnO<sub>2</sub>/MoS<sub>2</sub> electrode at different current densities

**Table S1** Comparison of Zn-MnO<sub>2</sub>/MoS<sub>2</sub>//AC with other studies in terms of potential window, energy density, power density and areal capacitance.

| Devices                                                    | Potential window (V) | Power density ( $\mu\text{W cm}^{-2}$ ) | Areal capacitance ( $\text{mF cm}^{-2}$ ) | Energy density ( $\mu\text{Wh cm}^{-2}$ ) | Ref.            |
|------------------------------------------------------------|----------------------|-----------------------------------------|-------------------------------------------|-------------------------------------------|-----------------|
| Si/C/MnO <sub>2</sub> //AC                                 | 0.8                  | 117                                     | 29                                        | 2                                         | 1               |
| GCNC/MnO <sub>2</sub> //AC                                 | 1.2                  | 282                                     | 60                                        | 10                                        | 2               |
| S-MnO <sub>2</sub> /MoS <sub>2</sub> //AC                  | 1.0                  | 50                                      | 27.5                                      | 3.8                                       | 3               |
| MnO <sub>2</sub> @Ppy@MWCNT//AC                            | 1.6                  | 136                                     | 21                                        | 12                                        | 4               |
| MnO <sub>2</sub> /CDCC//AC                                 | 1.5                  | 150                                     | 96                                        | 30                                        | 5               |
| NiO@MnO <sub>2</sub> //Fe <sub>2</sub> O <sub>3</sub> //AC | 1.2                  | 29                                      | 43                                        | 9                                         | 6               |
| <b>Zn-MnO<sub>2</sub>/MoS<sub>2</sub>//AC</b>              | <b>1.7</b>           | <b>423</b>                              | <b>205</b>                                | <b>82</b>                                 | <b>Our work</b> |

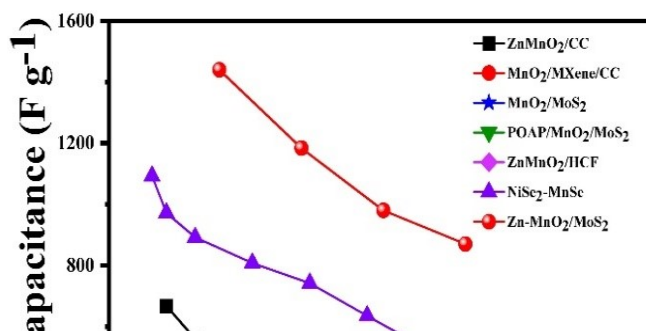

**Fig. S5.** Comparative analysis of specific capacitance between proposed Zn-MnO<sub>2</sub>/MoS<sub>2</sub> electrode and previously reported MnO<sub>2</sub>-based electrodes

**Table S2** Comparison of Zn-MnO<sub>2</sub>/MoS<sub>2</sub>//AC with other studies in terms of potential window, energy density, power density and specific capacitance.

| Devices                                       | Potential window (V) | Power density ( $\text{W kg}^{-1}$ ) | Specific capacitance ( $\text{F g}^{-1}$ ) | Energy density ( $\text{Wh kg}^{-1}$ ) | Ref.            |
|-----------------------------------------------|----------------------|--------------------------------------|--------------------------------------------|----------------------------------------|-----------------|
| AgCo <sub>3</sub> O <sub>4</sub> /FeMn-O//AC  | 1.6                  | 522                                  | 128                                        | 11.5                                   | 7               |
| MnO <sub>2</sub> /Co <sub>2</sub> CH@C//AC    | 1.7                  | 255                                  | 38                                         | 15                                     | 8               |
| Al doped MnO <sub>2</sub> //AC                | 1.6                  | 400                                  | 52                                         | 18.5                                   | 9               |
| MoS <sub>2</sub> /graphene//AC                | 1.4                  | 690                                  | 61                                         | 16                                     | 10              |
| MnO <sub>2</sub> /CeO <sub>2</sub> /MW//AC    | 1.4                  | 800                                  | 102                                        | 36                                     | 11              |
| ZnS/MnO <sub>2</sub> /MOF//AC                 | 1.4                  | 1050                                 | 112                                        | 30                                     | 12              |
| K doped MnO <sub>2</sub> //AC                 | 1.5                  | 432                                  | 78                                         | 24                                     | 13              |
| <b>Zn-MnO<sub>2</sub>/MoS<sub>2</sub>//AC</b> | <b>1.7</b>           | <b>1145</b>                          | <b>147</b>                                 | <b>59</b>                              | <b>Our work</b> |

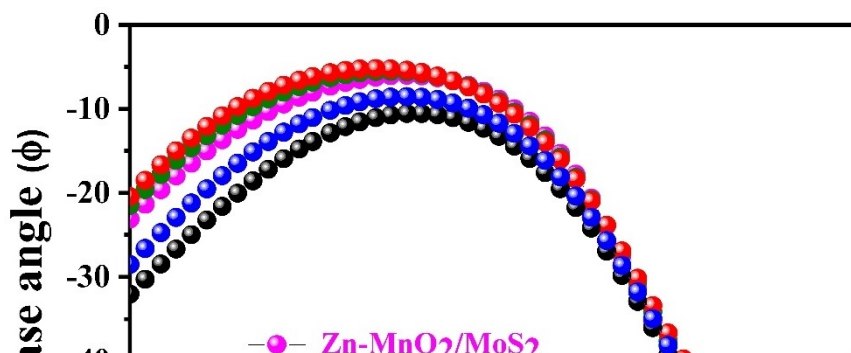

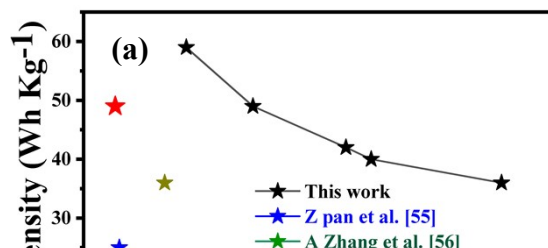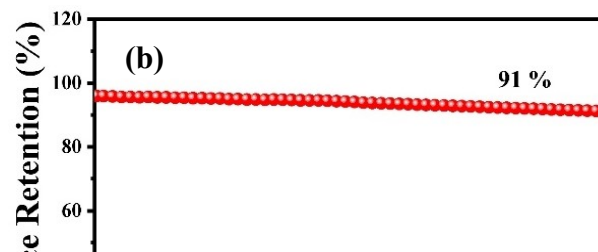

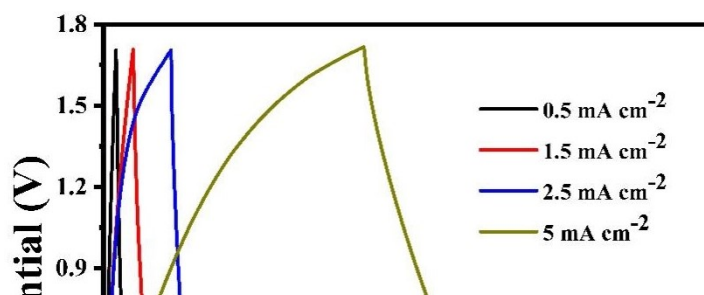

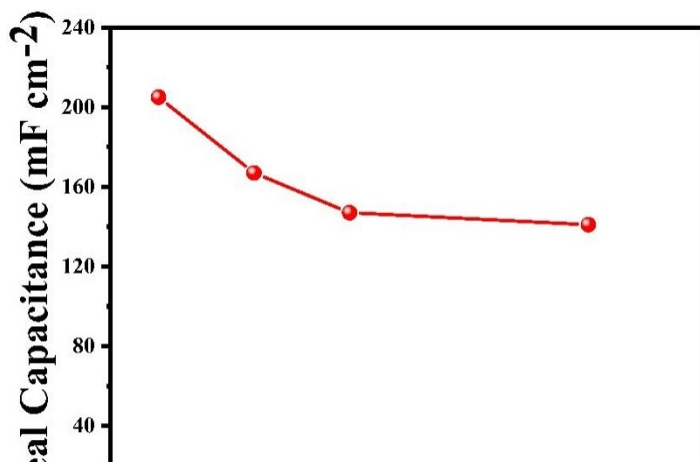

## References

1. Y. Wang, L. Sun, D. Xiao, H. Du, Z. Yang, X. Wang, L. Tu, C. Zhao, F. Hu and B. Lu, *ACS Applied Materials & Interfaces*, 2020, 12, 43864-43875.
2. L. Chen, T. Shen, Z. Hu, Z. Li and H.-Y. Yu, *International Journal of Biological Macromolecules*, 2024, 282, 137406.
3. H. Zhang, J. Wei, Y. Yan, Q. Guo, L. Xie, Z. Yang, J. He, W. Qi, Z. Cao and X. Zhao, *Journal of Power Sources*, 2020, 450, 227616.
4. J. Gao, C. Shao, S. Shao, F. Wan, C. Gao, Y. Zhao, L. Jiang and L. Qu, *Small*, 2018, 14, 1801809.

5. C. Wan, Y. Jiao, D. Liang, Y. Wu and J. Li, *Electrochimica Acta*, 2018, 285, 262-271.
6. X. Liu, J. Wang and G. Yang, *Chemical Engineering Journal*, 2018, 347, 101-110.
7. M. Anwar, A. Fazal, M. J. Iqbal, B. S. Almutairi, M. Z. Khan, M. Irshad, M. A. Raza, M. S. Butt, M. Saleem and W. Ahmed, *Journal of Energy Storage*, 2025, 105, 114602.
8. A. Zhang, N. Mao, Y. Zhong, W. Zheng, L. Cui, C. Barrow, J. Razal, W. Yang and J. Liu, *Composites Part B: Engineering*, 2021, 215, 108756.
9. X. Cheng, L. Zhang, L. Li, H. Wu, J. Zheng, J. Yao and G. Li, *Colloids and Surfaces A: Physicochemical and Engineering Aspects*, 2025, 709, 136163.
10. Y. Zhang, K. Li, X. Wang, S. Xiong, F. Chen and Y. Li, *Scientific Reports*, 2026, 16, 301.
11. M. M. A. Siddiqui, S. Abbas, F. Faiz, A. Zafar, S. Karim, H. Sun, A. Khalid, Y. Faiz, Y. Yu and H. Sultan, *New Journal of Chemistry*, 2025, 49, 8888-8897.
12. O. P. Nanda, P. Singh, Y. N. Banothu, R. Kumar and S. Badhulika, *Journal of Energy Storage*, 2024, 75, 109729.
13. X. Zhang, F. Zhang, D. Wei, Z. Cai, Y. Song and X. Wang, *Journal of Energy Storage*, 2023, 72, 108468.
